# Supplementary material
Source: PubMed Central journal article supplement (PMC8155811)

| Predictors of receiving Leukapheresis | OR(95% CI)      | P      |
|---------------------------------------|-----------------|--------|
| Age >= 55 years old                   | 1.41(0.82–2.44) | 0.216  |
| WBC > 100                             | 3.53(1.79–6.97) | <0.001 |
| Leukostasis                           | 6.06(3.37–10.9) | <0.001 |
| Unfavorable cytogenetic risk          | 2.05(1.08–3.88) | 0.028  |
| TLS                                   | 0.27(0.14–0.53) | <0.001 |
| Time to Chemo > 48 Hours              | 0.58(0.34–1)    | 0.052  |

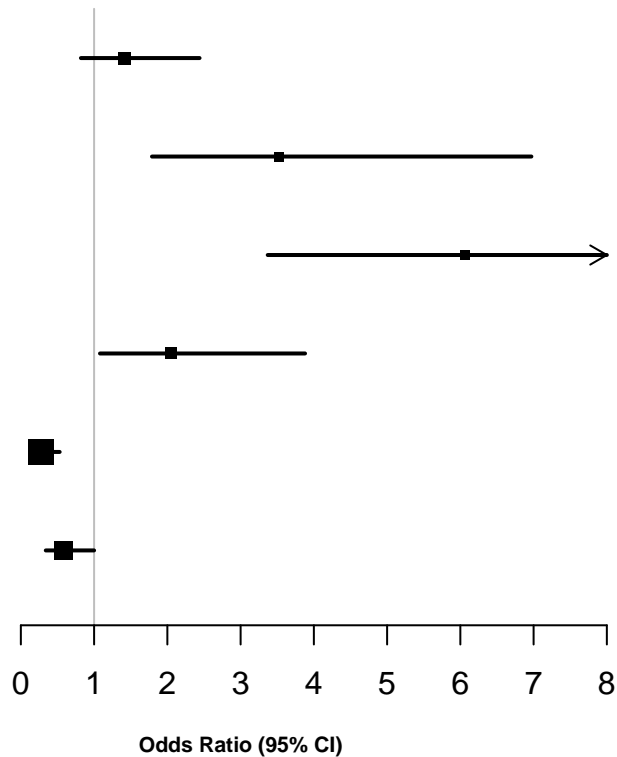

Supplement: NIHMS1564245-supplement-2.pdf [file NIHMS1564245-supplement-2.pdf]
