# Supplementary material
Source: PubMed Central journal article supplement (PMC8155811)

A)

| Predictors of 30 Day Mortality | OR(95% CI)      | P      |
|--------------------------------|-----------------|--------|
| Leukapheresis                  | 0.79(0.36–1.73) | 0.553  |
| Age >=55 Years                 | 4.47(2.78–7.21) | <0.001 |
| WBC >100                       | 1.57(0.98–2.5)  | 0.059  |
| Leukostasis                    | 3.58(2.24–5.71) | <0.001 |
| TLS                            | 1.32(0.8–2.2)   | 0.279  |
| Time to Chemo >48 hours        | 0.7(0.44–1.14)  | 0.15   |

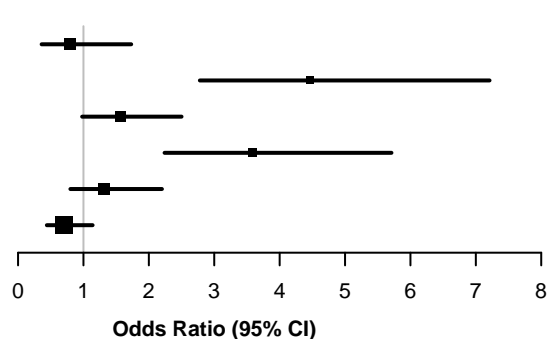

B)

| Predictors of OS        | HR(95% CI)      | P      |
|-------------------------|-----------------|--------|
| Leukapheresis           | 0.75(0.55–1.03) | 0.075  |
| Age >=55 Years          | 2.61(2.17–3.15) | <0.001 |
| WBC >100                | 1.2(0.99–1.46)  | 0.058  |
| Leukostasis             | 1.67(1.35–2.07) | <0.001 |
| TLS                     | 0.97(0.78–1.2)  | 0.766  |
| Time to Chemo >48 hours | 0.88(0.72–1.09) | 0.24   |

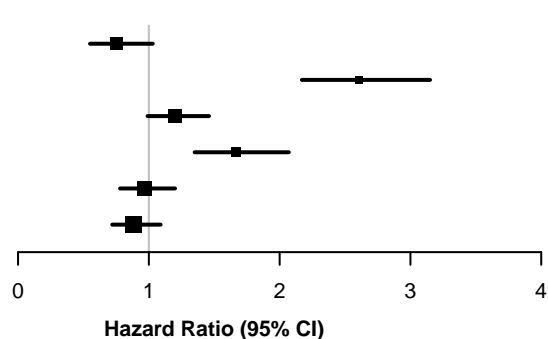

C)

| Predictors of CR/CRi    | OR(95% CI)      | P      |
|-------------------------|-----------------|--------|
| Leukapheresis           | 1.04(0.6–1.8)   | 0.878  |
| Age >=55 Years          | 0.3(0.21–0.42)  | <0.001 |
| WBC >100                | 0.87(0.61–1.24) | 0.451  |
| Poor Cytogenetics       | 0.48(0.29–0.79) | 0.004  |
| Leukostasis             | 0.37(0.25–0.55) | <0.001 |
| TLS                     | 1(0.67–1.48)    | 0.981  |
| Time to Chemo >48 hours | 1.39(0.96–2)    | 0.077  |

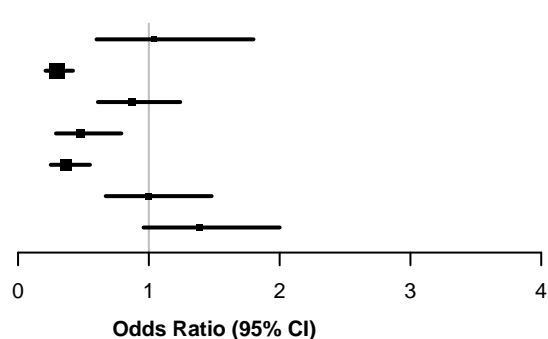

Supplement: NIHMS1564245-supplement-4.pdf [file NIHMS1564245-supplement-4.pdf]
